# Supplementary material for: SnSb/TiO2/C nanocomposite fabricated by high energy ball milling for high-performance lithium-ion batteries
Source: Royal Society of Chemistry journal article supplement (doi:10.1039/c5ra27326a), 2016-01-01
Supplement: c5ra27326a1.pdf [file c5ra27326a1.pdf]

## Supporting information

### **SnSb/TiO<sub>2</sub>/C nanocomposite fabricated by high energy ball milling for high-performance lithium-ion batteries**

Haihua Zhao,<sup>a,c</sup> Wen Qi,<sup>\*b</sup> Xuan Li,<sup>c</sup> Hong Zeng,<sup>b</sup> Ying Wu,<sup>b</sup> Jingwei Xiang,<sup>d</sup> Shengen Zhang,<sup>c</sup> Bo Li,<sup>a</sup> and Yunhui Huang<sup>\*d</sup>

<sup>a</sup> Central Iron and Steel Research Institute, 76 South Xueyuanlu Rd, Haidian District, Beijing 100081, China.

<sup>b</sup> Beijing Key Laboratory of Energy Nanomaterials, Advance Technology & Materials Co., Ltd, China Iron & steel Research Institute Group, Beijing 100081, China.

<sup>c</sup> Institute for Advanced Materials Technology and School of Materials Science and Engineering, University of Science and Technology Beijing, Beijing, 100083, China.

<sup>d</sup> State Key Laboratory of Material Processing and Die & Mould Technology, School of Materials Science and Engineering, Huazhong University of Science and Technology, Wuhan, Hubei 430074, China

<sup>e</sup> School of Materials Science and Engineering, Tianjin University, Tianjin, China

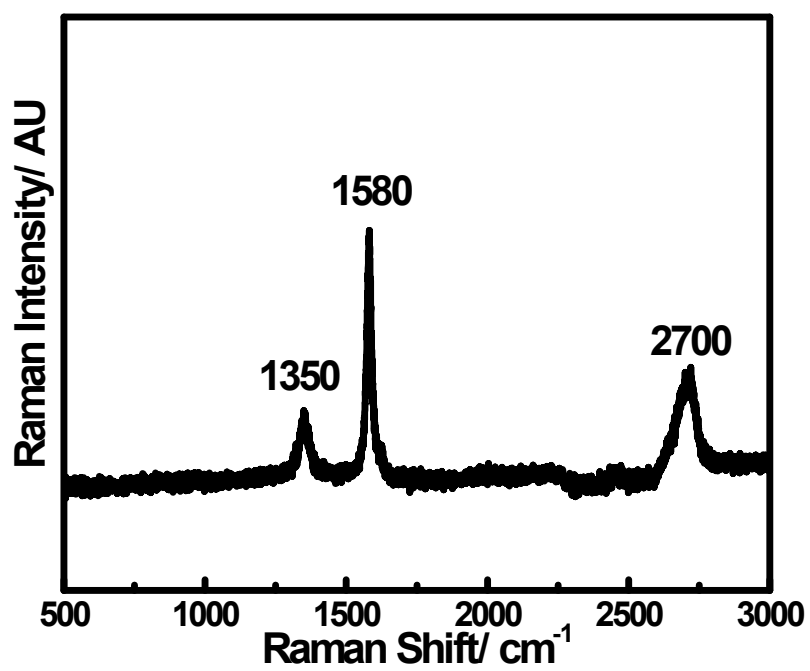

Figure S1. Raman spectrum of the raw graphite material.

(a)

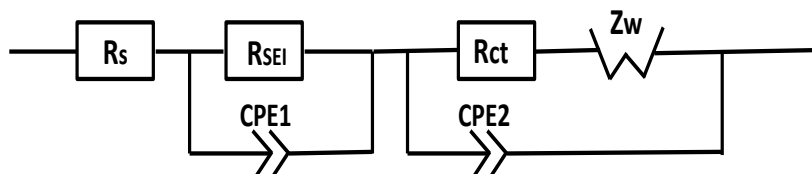

(b)

|                    | SnSb/TiO <sub>2</sub> | SnSb/TiO <sub>2</sub> /C | SnSb/C |
|--------------------|-----------------------|--------------------------|--------|
| $R_{SEI} (\Omega)$ | 123                   | 117.9                    | 309.6  |
| $R_{ct} (\Omega)$  | 102.1                 | 72.8                     | 269.6  |

**Figure S2.** (a) Equivalent circuit model used for calculation of  $R_{SEI}$  and  $R_{ct}$  of SnSb/TiO<sub>2</sub>, SnSb/TiO<sub>2</sub>/C, SnSb/C electrodes, (b)  $R_{SEI}$  and  $R_{ct}$  results for SnSb/TiO<sub>2</sub>, SnSb/TiO<sub>2</sub>/C, SnSb/C after the 1<sup>st</sup> discharge process at current density of 1 A g<sup>-1</sup>.

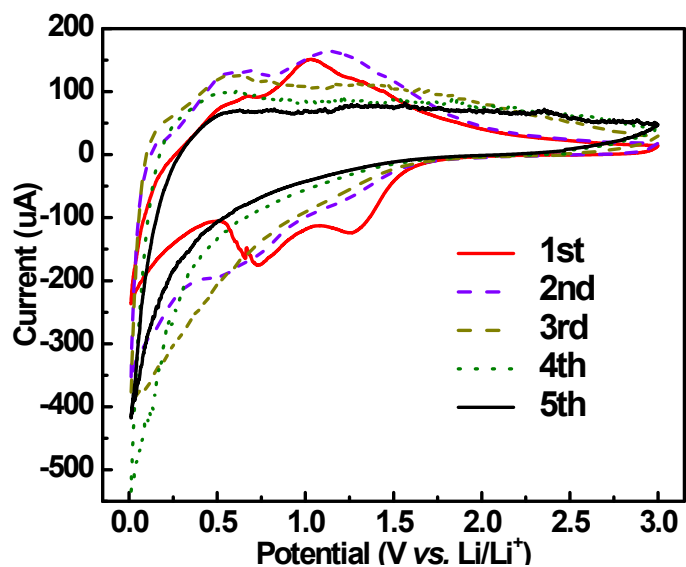

**Figure S3.** CV curves of SnSb/C nanocomposite tested at  $0.1 \text{ mV s}^{-1}$  in the potential window of 0.01-3 V vs. Li/Li<sup>+</sup>.

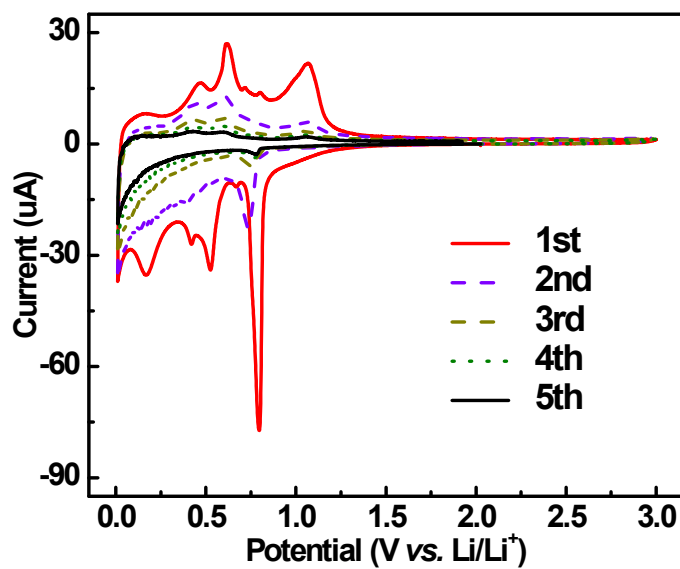

**Figure S4.** CV curves of SnSb/TiO<sub>2</sub> nanocomposite tested at  $0.1 \text{ mV s}^{-1}$  in the potential window of 0.01-3 V vs. Li/Li<sup>+</sup>.
